# Supplementary material
Source: PubMed Central journal article supplement (PMC8809308)
Supplement: KID.0000662019SupplementaryData.pdf [file KID.0000662019SupplementaryData.pdf]

Table A 1. Barriers to Home Dialysis

| Patient Related Factors                                                                                                                                                                                                                                                                                                                                                                                                                                                                                                                | Health System Related Factors                                                                                                                                                                                                                                                                                                                                                                                                                                                                                                                                                                                                                                                                                                                                                                                                                                                                    |
|----------------------------------------------------------------------------------------------------------------------------------------------------------------------------------------------------------------------------------------------------------------------------------------------------------------------------------------------------------------------------------------------------------------------------------------------------------------------------------------------------------------------------------------|--------------------------------------------------------------------------------------------------------------------------------------------------------------------------------------------------------------------------------------------------------------------------------------------------------------------------------------------------------------------------------------------------------------------------------------------------------------------------------------------------------------------------------------------------------------------------------------------------------------------------------------------------------------------------------------------------------------------------------------------------------------------------------------------------------------------------------------------------------------------------------------------------|
| <ol style="list-style-type: none"> <li>1. Education[49-51]</li> <li>2. Emotion and Social Needs/lack of motivation[49, 52]</li> <li>3. Fear of Incident at home[52]</li> <li>4. Care giver burnout[53, 54]</li> <li>5. Fear of self-cannulation (HHD)[27]</li> <li>6. Fear of isolation at home [55]/ Belief that patients will not be involved in care[52]</li> <li>7. Lack of awareness/availability of home dialysis [56]</li> <li>8. Fear of “bringing” their disease home and not being monitored by professionals[56]</li> </ol> | <ol style="list-style-type: none"> <li>1. Comfort of Physicians[9, 49]</li> <li>2. Ease of Availability               <ol style="list-style-type: none"> <li>a. Mindset: In- Center Hemodialysis is convenient; access placement and patient placement in dialysis units is well oiled.</li> <li>b. Access: suboptimal timely access placement for PD</li> <li>c. Education: Lack of time, and resources to educate patients, especially in the hospital</li> <li>d. Transition of care: lack of LDO support urgent PD starts and home dialysis nurses to support PD starts and home dialysis starts</li> </ol> </li> <li>3. Myths including high BMI[57], low socioeconomic status, risk of mediastinitis[57], and previous abdominal surgery being a contraindication for PD catheter placement[57]</li> <li>4. Lack of strong clinical evidence supporting the benefits of HHD[56]</li> </ol> |

Table A 2. Caveats in Pre-Dialysis Education

1. Lack of education[7, 50]
2. Education being very biased towards one modality[5, 6]
3. Education being provided very late[7]
4. Education may be too complex[58]
5. Education provided when patients are very sick[59]
6. Healthcare professionals' bias towards a modality[59]
7. Inadequate attention to individual patient needs[60]
8. Suboptimal involvement in treatment decision making from the patient[6]
9. Imbalanced education material [61, 62]

| Table A 3. UAB Urgent PD Protocol                                                                                                                                                                                                                                                                                                                                                                                                                                                                                                                                                                                                                                                |                                                                                                                                                                                                                                                                                                                                                              |
|----------------------------------------------------------------------------------------------------------------------------------------------------------------------------------------------------------------------------------------------------------------------------------------------------------------------------------------------------------------------------------------------------------------------------------------------------------------------------------------------------------------------------------------------------------------------------------------------------------------------------------------------------------------------------------|--------------------------------------------------------------------------------------------------------------------------------------------------------------------------------------------------------------------------------------------------------------------------------------------------------------------------------------------------------------|
| <b>Patient selection</b>                                                                                                                                                                                                                                                                                                                                                                                                                                                                                                                                                                                                                                                         |                                                                                                                                                                                                                                                                                                                                                              |
| <p><b>Suitable patients</b></p> <ul style="list-style-type: none"> <li>• Patient well educated about PD</li> <li>• Agreeable</li> <li>• Able to come to clinic for several weeks</li> <li>• *MATCH D criteria reviewed</li> </ul>                                                                                                                                                                                                                                                                                                                                                                                                                                                | <p><b>Advise Caution</b></p> <ul style="list-style-type: none"> <li>• Severe electrolyte abnormalities</li> <li>• Uremia affecting mentation</li> <li>• Volume overload affecting oxygenation</li> <li>• Lack of housing/transportation</li> </ul>                                                                                                           |
| <p><b>PD Catheter Placement</b></p> <p>IR or Surgery place the catheter<br/> Placed as an outpatient<br/> Can be used within 24-48 hours depending on indications to start dialysis<br/> If already inpatient, place catheter and perform low volume, supine exchanges prior to discharge</p>                                                                                                                                                                                                                                                                                                                                                                                    |                                                                                                                                                                                                                                                                                                                                                              |
| <p><b>Prescription*</b></p> <p>*All exchanges done with the patient supine for the first 2 weeks<br/> *Need a patient exam chair which can recline (LDOs can provide) in home unit</p>                                                                                                                                                                                                                                                                                                                                                                                                                                                                                           |                                                                                                                                                                                                                                                                                                                                                              |
| <p><u>No Residual Renal Function**</u></p> <ul style="list-style-type: none"> <li>• Fill volume of 1000 ml</li> <li>• 4-5 exchanges over 9 hours</li> <li>• 5 days a week</li> <li>• Increase fill volume by 500 ml every 3-5 days</li> </ul> <p>**Caution with fluid intake and diet</p>                                                                                                                                                                                                                                                                                                                                                                                        | <p><u>Residual Renal Function &gt;5 ml/min</u></p> <ul style="list-style-type: none"> <li>• Fill volume <ul style="list-style-type: none"> <li>○ BSA &lt;1.7 M2: 750 ml</li> <li>○ BSA &gt; 1.7 m2: 1000 ml</li> </ul> </li> <li>• 4-5 exchanges over 8-9 hours</li> <li>• 4-5 days a week</li> <li>• Increase fill volume by 500 ml every 5 days</li> </ul> |
| <p><b>Lab Tests</b></p> <ul style="list-style-type: none"> <li>• Labs checked on admission, and then weekly</li> <li>• Goal of urgent PD is NOT to achieve a weekly kt/v, but to transition patient to a full prescription without getting into complications</li> <li>• Prescription adjusted based on labs</li> </ul>                                                                                                                                                                                                                                                                                                                                                          |                                                                                                                                                                                                                                                                                                                                                              |
| <p><b>Logistics</b></p> <ul style="list-style-type: none"> <li>• Hospital nurses need training and in-service on urgent PD</li> <li>• Treat constipation and cough aggressively with new catheter while doing urgent PD</li> <li>• Discharge from hospital needs to be timed appropriately, especially around weekends and holidays (most units do not do urgent PD on the weekends or holidays)</li> <li>• Patient educated that they will spend a significant amount of time in dialysis unit in the first month; we ask them to bring their lunch and a blanket</li> <li>• Training often starts in week 2 of urgent PD; patients are able to go home in 4-5 weeks</li> </ul> |                                                                                                                                                                                                                                                                                                                                                              |
